# Supplementary material for: Bacteriophage conjugated IRMOF-3 as a novel opto-sensor for S. arlettae
Source: Royal Society of Chemistry journal article supplement (doi:10.1039/c6nj00899b), 2016-01-01
Supplement: c6nj00899b1.pdf [file c6nj00899b1.pdf]

## SUPPLEMENTARY INFORMATION

### **Bacteriophage Conjugated IRMOF-3 as a Novel Opto-Sensor for *S. arlettae***

Neha Bhardwaj<sup>a,b</sup>, Sanjeev K. Bhardwaj<sup>a,b</sup>, Jyotsana Mehta<sup>a,b</sup>, Manoj K Nayak<sup>a,b</sup>, Akash Deep<sup>a,b\*</sup>

<sup>a</sup>Central Scientific Instruments Organisation (CSIR-CSIO), Sector 30 C, Chandigarh, 160030, India; <sup>b</sup>Academy of Scientific and Innovative Research (AcSIR-CSIO), Sector 30 C, Chandigarh, 160030, India

Correspondence: [dr.akashdeep@csio.res.in](mailto:dr.akashdeep@csio.res.in), Tel: +91-172-2657811-452, Fax: +91-172-2657287

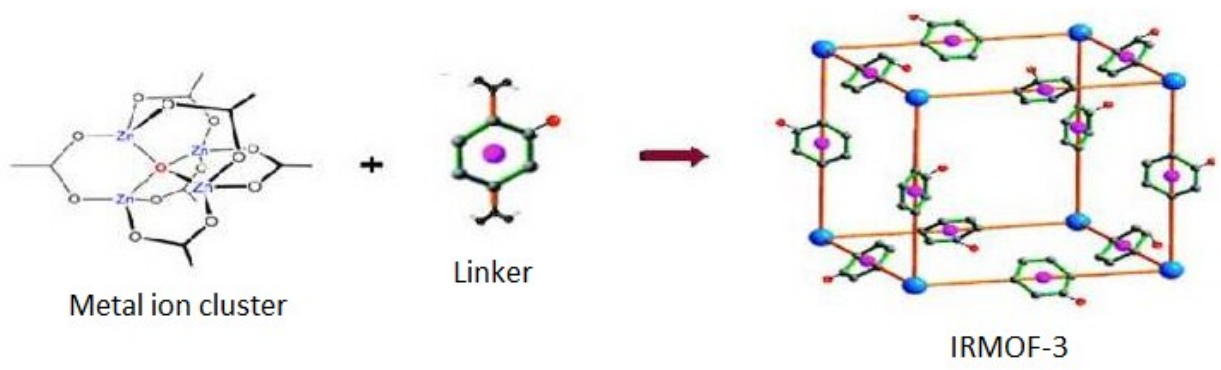

Fig. S1. Chemical structure of IRMOF-3

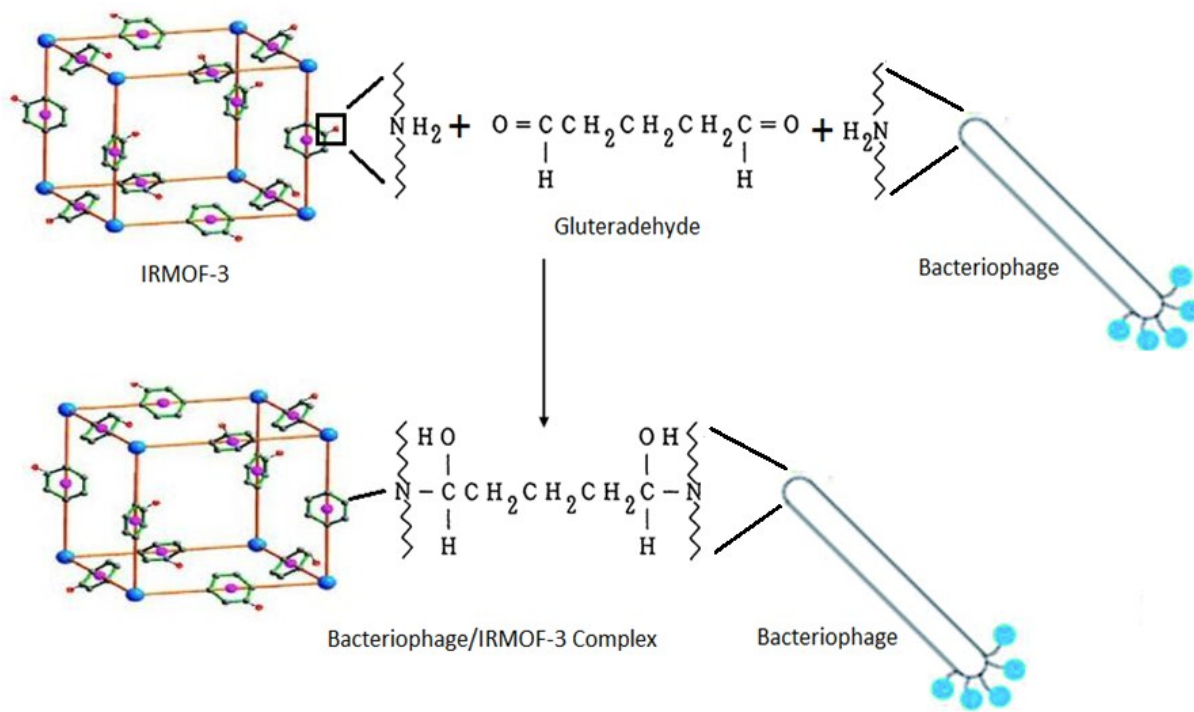

Fig. S2. Scheme for the bioconjugation of IRMOF-3 with bacteriophage

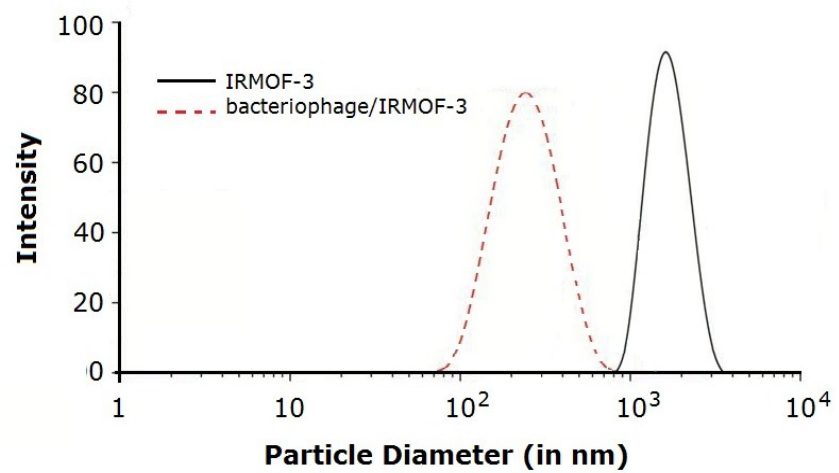

Fig. S3. Particle size distribution of IRMOF-3 and bacteriophage/IRMOF-3 complex

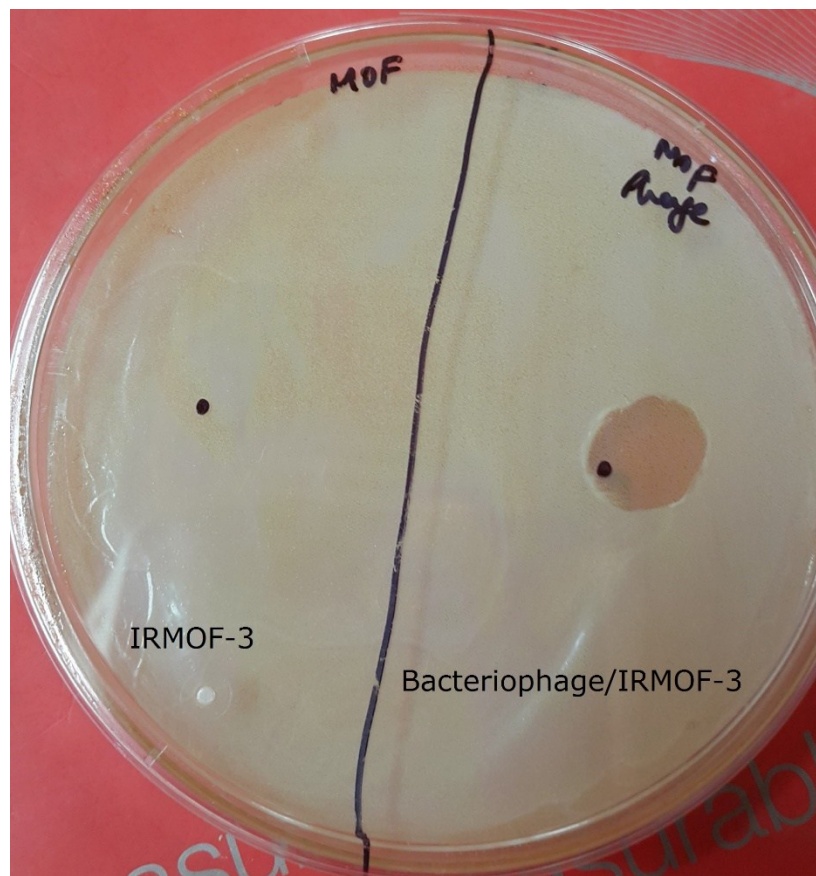

Fig. S4. Antimicrobial activity tests on IRMOF-3 and bacteriophage/IRMOF-3 complex. The positive antimicrobial activity of the bacteriophage/IRMOF-3 complex is a strong evidence of successful incorporation of bacteriophages with IRMOF-3. Note that the bacteriophage/IRMOF-3 complex was free from any unbound or loosely bound bacteriophage moieties as it was purified by washing thrice with Tris buffer before further use.

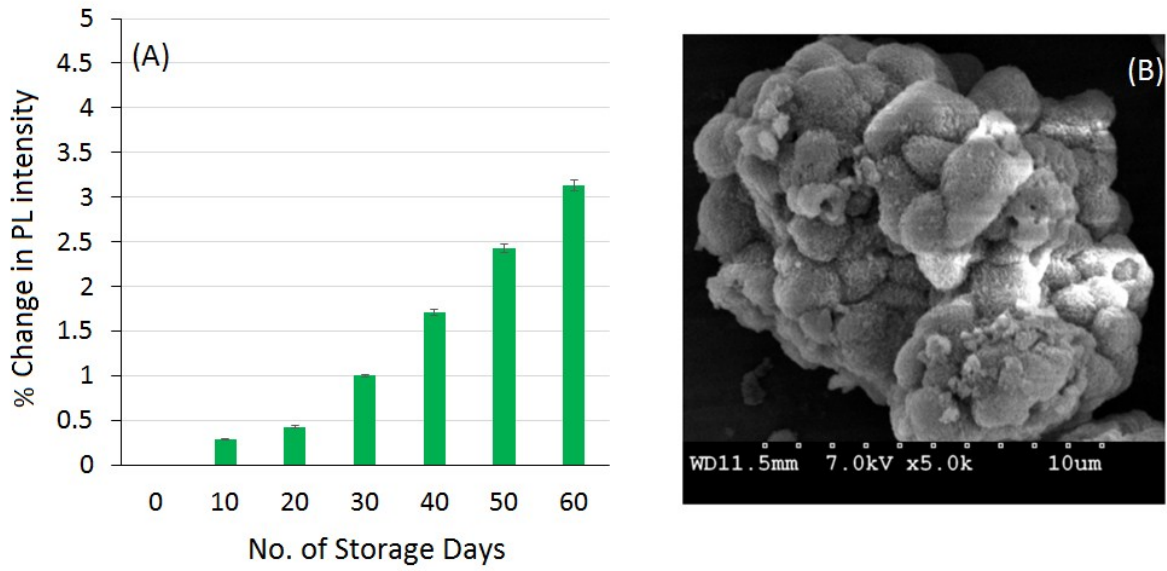

Fig. S5. (A) Response of the bacteriophage/IRMOF-3 sensor stored for prolonged durations; [*S. arlettae*] =  $10^2$  cfu/mL: (B) FE-SEM imaging of the bacteriophage/IRMOF-3 complex to assess the stability of its crystalline nature

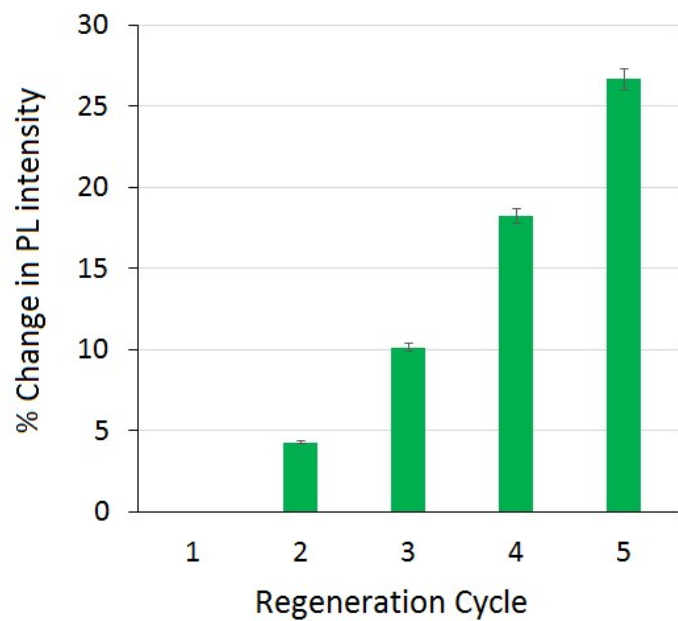

Fig. S6. Percentage variation in the PL response of the bacteriophage/IRMOF-3 sensor during successive regeneration cycles; [*S. arlettae*] =  $10^2$  cfu/mL
